# Supplementary material for: The Haptoglobin β chain as a supportive biomarker for human lung cancers
Source: Royal Society of Chemistry journal article supplement (doi:10.1039/c0mb00242a), 2011-01-21
Supplement: c0mb00242a-1.pdf [file c0mb00242a-1.pdf]

**Supplementary Table 1. Unique peptides detected in each band by proteomic analyses.**

| Band                  | Sequence                               | N hit | LC hit | ratio |
|-----------------------|----------------------------------------|-------|--------|-------|
| Band1                 | (K)YVMLPVADQDQCIR(H)                   | 7     | 14     | 2     |
|                       | (K)SCAVAEYGVYVK(V)                     | 9     | 20     | 2.22  |
|                       | (R)VMPICLPSK(D)                        | 0     | 2      | -     |
|                       | (K)VTSIQDWWQK(T)                       | 2     | 18     | 9     |
|                       | (K)DIAPTLTLYVGK(K)                     | 2     | 5      | 2.5   |
|                       | (K)SPVGVQPILNEHTFCAGMSK(Y)             | 3     | 21     | 7     |
|                       | (R)VG YVSGWGR(N)                       | 4     | 10     | 2.5   |
|                       | (K)LRTEGDGVYTLNDKK(Q)                  | 2     | 0      | -     |
|                       | (R)ILGGHLDAK(G)                        | 0     | 4      | -     |
|                       | (K)AVGDKLPECEADDGCPK(P)                | 0     | 2      | -     |
|                       | (R)HYEGSTVPEK(K)                       | 0     | 2      | -     |
|                       | (K)VVLHPNYSQVDIGLIK(L)                 | 0     | 3      | -     |
|                       | (K)LRTEGDGVYTLNNEK(Q)                  | 0     | 2      | -     |
|                       | (R)VMPICLPSKD YAEVGR(V)                | 3     | 14     | 4.67  |
| (R)HYEGSTVPEKK(T)     | 0                                      | 2     | -      |       |
| Band2                 | (K)YVMLPVADQDQCIR(H)                   | 0     | 3      | -     |
|                       | (K)LRTEGDGVYTLNDK(K)                   | 4     | 10     | 2.5   |
|                       | (K)AVGDKLPECEADDGCPK PPEIAHGYVEHSVR(Y) | 0     | 6      | -     |
|                       | (K)LPECEAVCGKPK(N)                     | 2     | 2      | 1     |
|                       | (K)VTSIQDWWQK(T)                       | 0     | 2      | -     |
|                       | (K)SPVGVQPILNEHTFCAGMSK(Y)             | 0     | 1      | -     |
|                       | (R)VG YVSGWGR(N)                       | 0     | 1      | -     |
|                       | (K)LPECEADDGCPK PPEIAHGYVEHSVR(Y)      | 1     | 1      | 1     |
|                       | (K)AVGDKLPECEAVCGK(P)                  | 1     | 4      | 4     |
|                       | (R)TEGDGVYTLNDK(K)                     | 2     | 2      | 1     |
|                       | (K)AVGDKLPECEAVCGKPK(N)                | 5     | 16     | 3.2   |
|                       | (K)LRTEGDGVYTLNDKK(Q)                  | 6     | 28     | 4.67  |
|                       | (K)LRTEGDGVYTLNNEK(Q)                  | 1     | 3      | 3     |
|                       | (R)TEGDGVYTLNDKK(Q)                    | 4     | 8      | 2     |
| (R)TEGDGVYTLNNEK(Q)   | 2                                      | 4     | 2      |       |
| Band3                 | (K)YVMLPVADQDQCIR(H)                   | 0     | 3      | -     |
|                       | (K)SCAVAEYGVYVK(V)                     | 0     | 2      | -     |
|                       | (K)LRTEGDGVYTLNDK(K)                   | 2     | 2      | 1     |
|                       | (K)LPECEAVCGKPK(N)                     | 2     | 2      | 1     |
|                       | (K)VTSIQDWWQK(T)                       | 2     | 2      | 1     |
|                       | (K)SPVGVQPILNEHTFCAGMSK(Y)             | 0     | 2      | -     |
|                       | (K)LPECEADDGCPK PPEIAHGYVEHSVR(Y)      | 0     | 1      | -     |
|                       | (K)AVGDKLPECEAVCGK(P)                  | 0     | 2      | -     |
|                       | (R)TEGDGVYTLNDK(K)                     | 0     | 2      | -     |
|                       | (K)AVGDKLPECEAVCGKPK(N)                | 2     | 6      | 3     |
|                       | (K)AVGDKLPECEADDGCPK(P)                | 0     | 1      | -     |
|                       | (K)LRTEGDGVYTLNDKK(Q)                  | 5     | 9      | 1.8   |
|                       | (R)HYEGSTVPEK(K)                       | 2     | 0      | -     |
|                       | (K)LRTEGDGVYTLNNEKQWINK(A)             | 0     | 1      | -     |
| (K)LRTEGDGVYTLNNEK(Q) | 0                                      | 1     | -      |       |
| (R)TEGDGVYTLNDKK(Q)   | 2                                      | 4     | 2      |       |
| (R)TEGDGVYTLNNEK(Q)   | 2                                      | 2     | 1      |       |
