# Supplementary material for: The Haptoglobin β chain as a supportive biomarker for human lung cancers
Source: Royal Society of Chemistry journal article supplement (doi:10.1039/c0mb00242a), 2011-01-21
Supplement: c0mb00242a-2.pdf [file c0mb00242a-2.pdf]

**Supplementary Table 2. Unique peptides detected in each chain by proteomic analyses.**

| Chain                         | Sequence                              | Origin<br>(band No.) | N hit | LC<br>hit | ratio |
|-------------------------------|---------------------------------------|----------------------|-------|-----------|-------|
| $\alpha 1, \alpha 2$<br>chain | (K)AVGDKLPECEADDGCPK(P)               | 1                    | 0     | 2         | -     |
|                               | (K)LRTEGDGVYTLNNEK(Q)                 | 1,2,3                | 1     | 6         | 6.0   |
|                               | (K)LPECEAVCGKPK(N)                    | 2,3                  | 4     | 4         | 1.0   |
|                               | (K)LPECEADDGCPKPPEIAHGYVEHSVR(Y)      | 2,3                  | 1     | 2         | 2.0   |
|                               | (K)AVGDKLPECEAVCGKPK(N)               | 2,3                  | 7     | 22        | 3.14  |
|                               | (K)AVGDKLPECEAVCGK(P)                 | 2,3                  | 1     | 6         | 6.0   |
|                               | (R)TEGDGVYTLNNEK(Q)                   | 2,3                  | 4     | 6         | 1.5   |
|                               | (K)LRTEGDGVYTLNNEKQWINK(A)            | 3                    | 0     | 1         | -     |
| $\alpha 2$<br>chain           | (K)LRTEGDGVYTLNDKK(Q)                 | 12,3                 | 13    | 37        | 2.85  |
|                               | (K)LRTEGDGVYTLNDK(K)                  | 2,3                  | 6     | 12        | 2     |
|                               | (K)AVGDKLPECEADDGCPKPPEIAHGYVEHSVR(Y) | 2                    | 0     | 6         | -     |
|                               | (R)TEGDGVYTLNDK(K)                    | 2,3                  | 2     | 4         | 2.0   |
|                               | (R)TEGDGVYTLNDKK(Q)                   | 2,3                  | 6     | 12        | 2.0   |
|                               | (K)AVGDKLPECEADDGCPK(P)               | 3                    | 0     | 1         | -     |
| $\beta$ chain                 | (K)YVMLPVADQDQCIR(H)                  | 1,2,3                | 7     | 20        | 2.86  |
|                               | (K)SCAVAEYGVYVK(V)                    | 1,3                  | 9     | 22        | 2.44  |
|                               | (R)VMPICLPSK(D)                       | 1                    | 0     | 2         | -     |
|                               | (K)VTSIQDWVQK(T)                      | 1,2,3                | 4     | 22        | 5.5   |
|                               | (K)DIAPTLTLYVGK(K)                    | 1                    | 2     | 5         | 2.5   |
|                               | (K)SPVGVQPILNEHTFCAGMSK(Y)            | 1,2,3                | 3     | 24        | 8.0   |
|                               | (R)VGYVSGWGR(N)                       | 1,2                  | 4     | 11        | 2.75  |
|                               | (R)ILGGHLDAK(G)                       | 1                    | 0     | 4         | -     |
|                               | (R)HYEGSTVPEK(K)                      | 1,3                  | 2     | 2         | 1     |
|                               | (K)VVLHPNYSQVDIGLIK(L)                | 1                    | 0     | 3         | -     |
|                               | (R)VMPICLPSKDYAEVGR(V)                | 1                    | 3     | 14        | 4.67  |
|                               | (R)HYEGSTVPEKK(T)                     | 1                    | 0     | 2         | -     |
